# Supplementary material for: From self-assembly of electrospun nanofibers to 3D cm thick hierarchical foams
Source: Royal Society of Chemistry journal article supplement (doi:10.1039/c2sm27543k), 2013-01-01
Supplement: c2sm27543k.pdf [file c2sm27543k.pdf]

## *Supporting Information*

# **From Self-assembly of Electrospun NanoFibers to 3D cm-thick Hierarchical Foams**

Deepak Ahirwal<sup>a,b</sup>, Anne Hébraud<sup>a</sup>, Roland Kádár<sup>b</sup>, Manfred Wilhelm<sup>b</sup> and Guy

Schlatter<sup>a,\*</sup>

<sup>a</sup>*Laboratoire d'Ingénierie des Polymères pour les Hautes Technologies, LIPHT EAC 4379 –  
convention CNRS, Institut Carnot MICA, Ecole Européenne de Chimie, Polymères et Matériaux,  
Université de Strasbourg, 25 rue Becquerel, 67087 Strasbourg Cedex 2, France*

<sup>b</sup>*Karlsruhe Institute of Technology (KIT), Department of Chemistry and Bioscience, Institute of  
Chemical Technology and Polymerchemistry, Engesserstr. 18, 76131 Karlsruhe, German*

### Complementary pictures of dynamic self-assembling

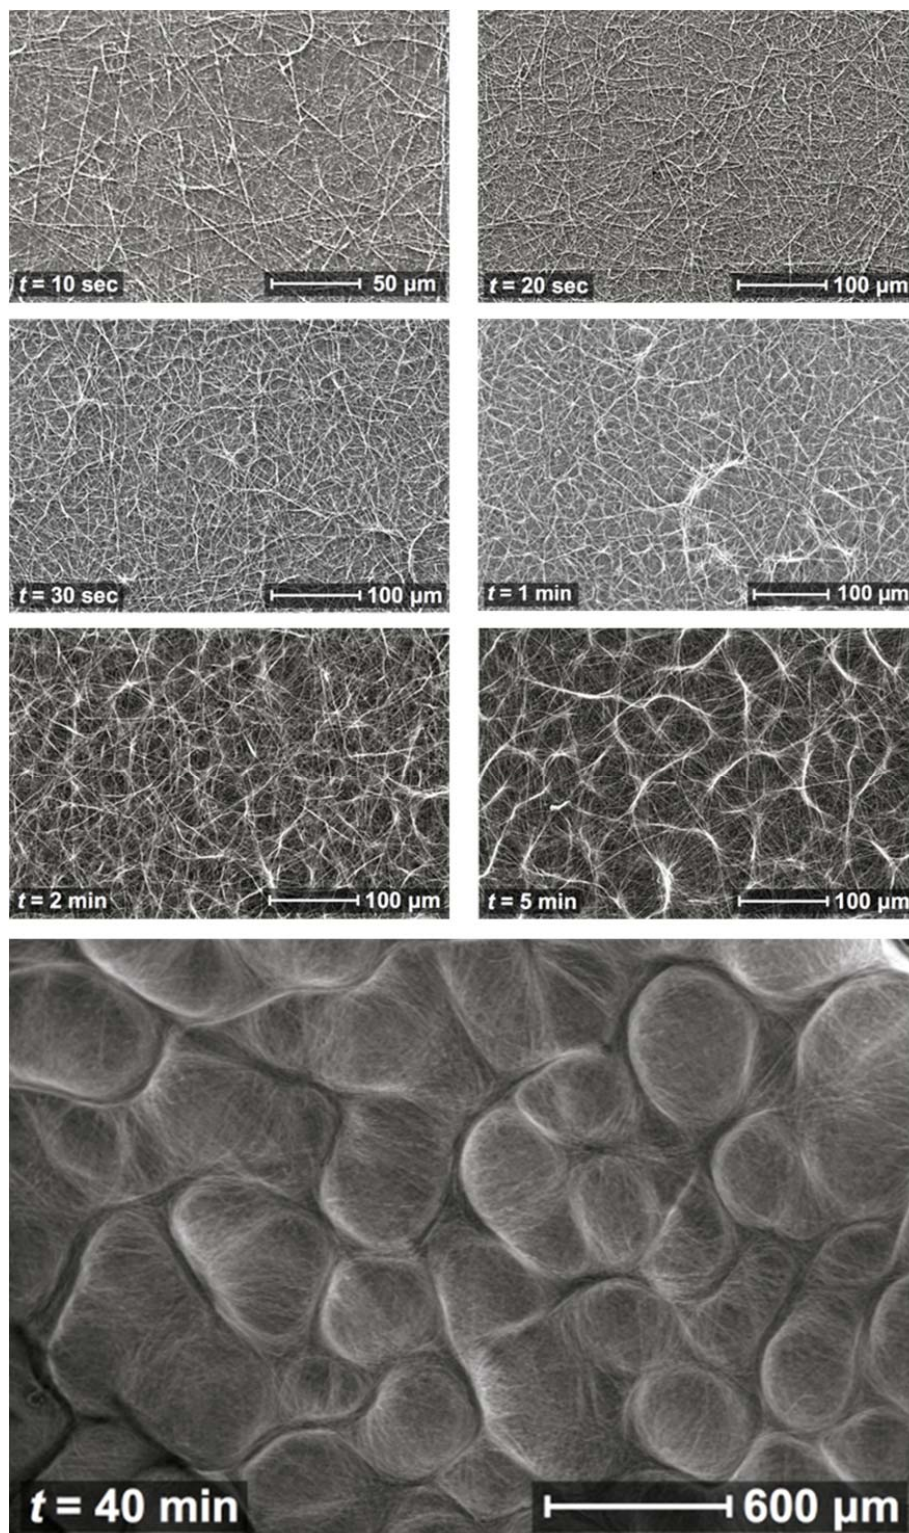

**Figure S1:** Electrospun scaffold morphologies at different deposition time  $t$  obtained with PCL concentration at 13% wt,  $V_{\text{needle}} = 10$  kV and  $V_{\text{collector}} = -10$  kV

### First moments of electrospinning in the case of elongated beaded fibres

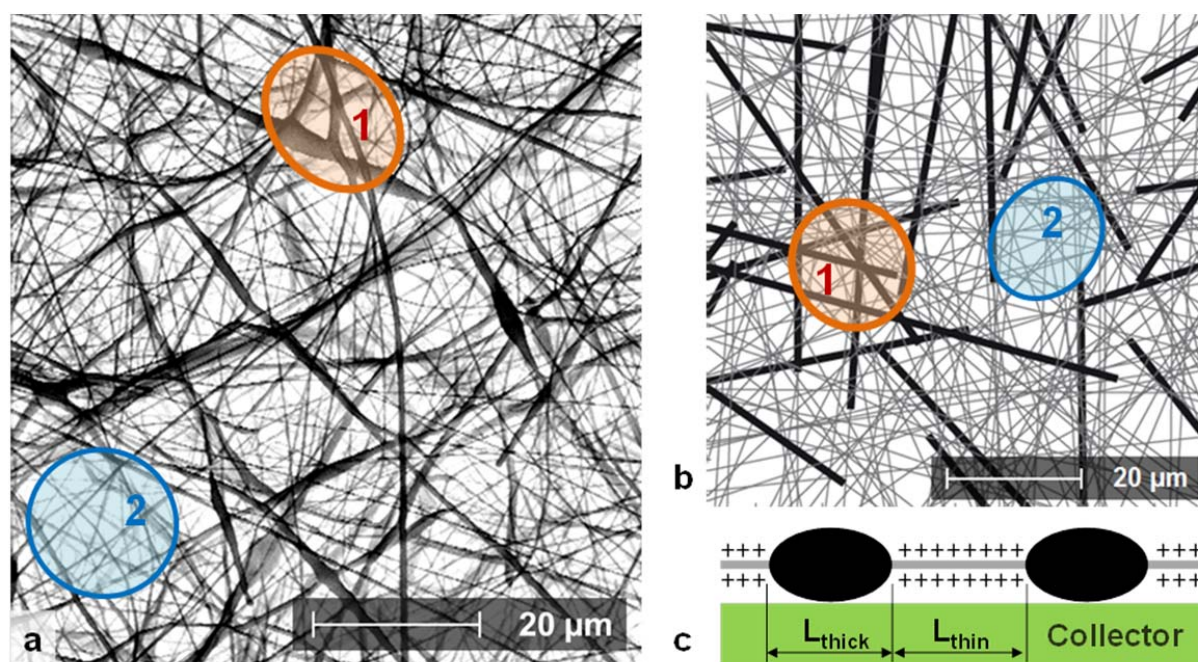

**Figure S2:** [a] SEM picture showing the very first moments (10 s) of the deposition of irregular electrospun nanofibres with elongated beads obtained with PCL concentration at 13% wt,  $V_{needle} = 10$  kV and  $V_{collector} = -10$  kV. Region 1 shows the aggregation of thick fibre domains whereas only thin fibres cover the region 2. [b] Monte-Carlo simulation of previous picture showing the aggregation of thick fibre domains after a random deposition of 150 fibres with characteristic length  $L_{thick} = 70$  μm and  $L_{thin} = 800$  μm. [c] Schematic section of a heterogeneous fibre deposited on the collector.
